# Supplementary material
Source: PubMed Central journal article supplement (PMC7000272)
Supplement: NIHMS1061490-supplement-Table_S1_.pdf [file NIHMS1061490-supplement-Table_S1_.pdf]

| From Molecule(s) | Relationship Type            | To Molecule(s) |
|------------------|------------------------------|----------------|
| ATF3             | protein-protein interactions | RELA           |
| ATF3             | regulation of binding        | RELA           |
| CUX1             | modification                 | RELA           |
| CUX1             | protein-protein interactions | RELA           |
| CYLD             | activation                   | RELA           |
| FOXM1            | expression                   | RELA           |
| FOXO3            | activation                   | RELA           |
| FOXO3            | expression                   | RELA           |
| FOXO3            | protein-protein interactions | RELA           |
| FOXO3            | translocation                | RELA           |
| HOXA10           | expression                   | RELA           |
| NFKBIZ           | protein-protein interactions | RELA           |
| NFKBIZ           | regulation of binding        | RELA           |
| NOTCH3           | activation                   | RELA           |
| PIAS3            | protein-protein interactions | RELA           |
| PIAS3            | regulation of binding        | RELA           |
| PIAS3            | transcription                | RELA           |
| PML              | protein-protein interactions | RELA           |
| PML              | regulation of binding        | RELA           |
| POU2F1           | expression                   | RELA           |
| POU2F1           | protein-protein interactions | RELA           |
| REL              | expression                   | RELA           |
| REL              | protein-DNA interactions     | RELA           |
| REL              | protein-protein interactions | RELA           |
| RELA             | activation                   | REL            |
| RELA             | activation                   | RELA           |
| RELA             | activation                   | SMAD3          |
| RELA             | expression                   | ACTA2          |
| RELA             | expression                   | AHR            |
| RELA             | expression                   | BACE1          |
| RELA             | expression                   | BACH2          |
| RELA             | expression                   | BCL2           |
| RELA             | expression                   | BCL3           |
| RELA             | expression                   | BEX2           |
| RELA             | expression                   | BIRC3          |
| RELA             | expression                   | BRCA2          |
| RELA             | expression                   | CASP8          |
| RELA             | expression                   | CCL2           |
| RELA             | expression                   | CCL20          |
| RELA             | expression                   | CD274          |
| RELA             | expression                   | CD59           |
| RELA             | expression                   | CDKN2A         |
| RELA             | expression                   | CFB            |
| RELA             | expression                   | CFTR           |
| RELA             | expression                   | CXCL2          |
| RELA             | expression                   | CXCL5          |

|      |            |          |
|------|------------|----------|
| RELA | expression | CXCL8    |
| RELA | expression | CYP2C9   |
| RELA | expression | DDIT3    |
| RELA | expression | DUSP1    |
| RELA | expression | EGR1     |
| RELA | expression | EPAS1    |
| RELA | expression | ERAP1    |
| RELA | expression | ERAP2    |
| RELA | expression | EZH2     |
| RELA | expression | FOS      |
| RELA | expression | GRK5     |
| RELA | expression | GSTA1    |
| RELA | expression | HIF1A    |
| RELA | expression | HSP90B1  |
| RELA | expression | ICAM1    |
| RELA | expression | IGF1     |
| RELA | expression | IGF1R    |
| RELA | expression | IKBKE    |
| RELA | expression | IL1B     |
| RELA | expression | IL32     |
| RELA | expression | IRF1     |
| RELA | expression | JUNB     |
| RELA | expression | KLF10    |
| RELA | expression | MICA     |
| RELA | expression | MMP1     |
| RELA | expression | MST1R    |
| RELA | expression | MYC      |
| RELA | expression | NFKB1    |
| RELA | expression | NFKB2    |
| RELA | expression | NFKBIA   |
| RELA | expression | NFKBIE   |
| RELA | expression | NMI      |
| RELA | expression | NOX1     |
| RELA | expression | NR4A2    |
| RELA | expression | OAS2     |
| RELA | expression | P2RY2    |
| RELA | expression | PDE4B    |
| RELA | expression | PLAU     |
| RELA | expression | PLK1     |
| RELA | expression | PPARG    |
| RELA | expression | PTGES    |
| RELA | expression | PTGS2    |
| RELA | expression | RELA     |
| RELA | expression | RELB     |
| RELA | expression | SAA1     |
| RELA | expression | SDC4     |
| RELA | expression | SERPINE2 |

|      |                          |         |
|------|--------------------------|---------|
| RELA | expression               | SOD2    |
| RELA | expression               | TANK    |
| RELA | expression               | TGM2    |
| RELA | expression               | TLR2    |
| RELA | expression               | TNF     |
| RELA | expression               | TNFAIP2 |
| RELA | expression               | TNFAIP3 |
| RELA | expression               | TNIP1   |
| RELA | expression               | TSLP    |
| RELA | expression               | TWIST1  |
| RELA | expression               | UBD     |
| RELA | expression               | UGT1A1  |
| RELA | expression               | VEGFA   |
| RELA | expression               | WASF3   |
| RELA | localization             | STAT3   |
| RELA | modification             | RELA    |
| RELA | molecular cleavage       | FOXO3   |
| RELA | molecular cleavage       | RELA    |
| RELA | phosphorylation          | RELA    |
| RELA | phosphorylation          | SMAD3   |
| RELA | protein-DNA interactions | ALCAM   |
| RELA | protein-DNA interactions | APP     |
| RELA | protein-DNA interactions | AR      |
| RELA | protein-DNA interactions | B2M     |
| RELA | protein-DNA interactions | BACE1   |
| RELA | protein-DNA interactions | BCL10   |
| RELA | protein-DNA interactions | BCL2    |
| RELA | protein-DNA interactions | BCL3    |
| RELA | protein-DNA interactions | BIRC3   |
| RELA | protein-DNA interactions | BIRC5   |
| RELA | protein-DNA interactions | BRCA2   |
| RELA | protein-DNA interactions | C3      |
| RELA | protein-DNA interactions | CCL2    |
| RELA | protein-DNA interactions | CCL20   |
| RELA | protein-DNA interactions | CD44    |
| RELA | protein-DNA interactions | CD59    |
| RELA | protein-DNA interactions | CIITA   |
| RELA | protein-DNA interactions | CTGF    |
| RELA | protein-DNA interactions | CXCL2   |
| RELA | protein-DNA interactions | CXCL8   |
| RELA | protein-DNA interactions | DUSP1   |
| RELA | protein-DNA interactions | E2F1    |
| RELA | protein-DNA interactions | EGR1    |
| RELA | protein-DNA interactions | ELF3    |
| RELA | protein-DNA interactions | ERAP1   |
| RELA | protein-DNA interactions | ERAP2   |
| RELA | protein-DNA interactions | F3      |

|      |                          |         |
|------|--------------------------|---------|
| RELA | protein-DNA interactions | FN1     |
| RELA | protein-DNA interactions | GRK5    |
| RELA | protein-DNA interactions | HES1    |
| RELA | protein-DNA interactions | ICAM1   |
| RELA | protein-DNA interactions | IER3    |
| RELA | protein-DNA interactions | IFNGR2  |
| RELA | protein-DNA interactions | IGFBP2  |
| RELA | protein-DNA interactions | IL15RA  |
| RELA | protein-DNA interactions | IL1B    |
| RELA | protein-DNA interactions | IL1RN   |
| RELA | protein-DNA interactions | IL7R    |
| RELA | protein-DNA interactions | IRF1    |
| RELA | protein-DNA interactions | LTB     |
| RELA | protein-DNA interactions | MICA    |
| RELA | protein-DNA interactions | MMP1    |
| RELA | protein-DNA interactions | MST1R   |
| RELA | protein-DNA interactions | MUC1    |
| RELA | protein-DNA interactions | MYB     |
| RELA | protein-DNA interactions | MYC     |
| RELA | protein-DNA interactions | NFKB1   |
| RELA | protein-DNA interactions | NFKB2   |
| RELA | protein-DNA interactions | NFKBIA  |
| RELA | protein-DNA interactions | NFKBID  |
| RELA | protein-DNA interactions | NFKBIE  |
| RELA | protein-DNA interactions | NOD2    |
| RELA | protein-DNA interactions | NOX1    |
| RELA | protein-DNA interactions | P2RY2   |
| RELA | protein-DNA interactions | PI3     |
| RELA | protein-DNA interactions | PLAU    |
| RELA | protein-DNA interactions | PLK1    |
| RELA | protein-DNA interactions | PRKCD   |
| RELA | protein-DNA interactions | PSMB9   |
| RELA | protein-DNA interactions | PTGS2   |
| RELA | protein-DNA interactions | REL     |
| RELA | protein-DNA interactions | RELA    |
| RELA | protein-DNA interactions | RELB    |
| RELA | protein-DNA interactions | SLC1A2  |
| RELA | protein-DNA interactions | SOD2    |
| RELA | protein-DNA interactions | SOX9    |
| RELA | protein-DNA interactions | STAT5A  |
| RELA | protein-DNA interactions | TAP1    |
| RELA | protein-DNA interactions | TAPBP   |
| RELA | protein-DNA interactions | TGM2    |
| RELA | protein-DNA interactions | TLR2    |
| RELA | protein-DNA interactions | TNF     |
| RELA | protein-DNA interactions | TNFAIP2 |
| RELA | protein-DNA interactions | TNFAIP3 |

|      |                              |        |
|------|------------------------------|--------|
| RELA | protein-DNA interactions     | TNIP1  |
| RELA | protein-DNA interactions     | TSLP   |
| RELA | protein-DNA interactions     | VASP   |
| RELA | protein-DNA interactions     | VEGFA  |
| RELA | protein-DNA interactions     | VHL    |
| RELA | protein-DNA interactions     | VIM    |
| RELA | protein-protein interactions | AFF1   |
| RELA | protein-protein interactions | ATF3   |
| RELA | protein-protein interactions | ATF4   |
| RELA | protein-protein interactions | BCL11B |
| RELA | protein-protein interactions | BRCA1  |
| RELA | protein-protein interactions | CEBPD  |
| RELA | protein-protein interactions | CTNNB1 |
| RELA | protein-protein interactions | CUX1   |
| RELA | protein-protein interactions | DAXX   |
| RELA | protein-protein interactions | EZH2   |
| RELA | protein-protein interactions | FOXO3  |
| RELA | protein-protein interactions | HES6   |
| RELA | protein-protein interactions | ILF2   |
| RELA | protein-protein interactions | IRF2   |
| RELA | protein-protein interactions | IRF9   |
| RELA | protein-protein interactions | KLF4   |
| RELA | protein-protein interactions | LEF1   |
| RELA | protein-protein interactions | MECOM  |
| RELA | protein-protein interactions | NFKBIZ |
| RELA | protein-protein interactions | NPM1   |
| RELA | protein-protein interactions | NRIP1  |
| RELA | protein-protein interactions | PHB2   |
| RELA | protein-protein interactions | PIAS3  |
| RELA | protein-protein interactions | PML    |
| RELA | protein-protein interactions | POU2F1 |
| RELA | protein-protein interactions | REL    |
| RELA | protein-protein interactions | RELA   |
| RELA | protein-protein interactions | SMAD1  |
| RELA | protein-protein interactions | SMAD3  |
| RELA | protein-protein interactions | STAT3  |
| RELA | protein-protein interactions | TAF4B  |
| RELA | regulation of binding        | ATF4   |
| RELA | regulation of binding        | RELA   |
| RELA | transcription                | APP    |
| RELA | transcription                | AR     |
| RELA | transcription                | B2M    |
| RELA | transcription                | BIRC3  |
| RELA | transcription                | BLVRA  |
| RELA | transcription                | CCL20  |
| RELA | transcription                | CDKN2A |
| RELA | transcription                | CXCL2  |

|        |                              |         |
|--------|------------------------------|---------|
| RELA   | transcription                | CXCL8   |
| RELA   | transcription                | DDIT3   |
| RELA   | transcription                | DUSP1   |
| RELA   | transcription                | GBP1    |
| RELA   | transcription                | HLA-B   |
| RELA   | transcription                | ICAM1   |
| RELA   | transcription                | ID1     |
| RELA   | transcription                | IER3    |
| RELA   | transcription                | IL1RN   |
| RELA   | transcription                | KRT15   |
| RELA   | transcription                | MMP1    |
| RELA   | transcription                | MYC     |
| RELA   | transcription                | NFATC1  |
| RELA   | transcription                | NFKB1   |
| RELA   | transcription                | NFKB2   |
| RELA   | transcription                | NFKBIA  |
| RELA   | transcription                | NFKBIB  |
| RELA   | transcription                | NOD2    |
| RELA   | transcription                | P2RY2   |
| RELA   | transcription                | PLAU    |
| RELA   | transcription                | PRDX6   |
| RELA   | transcription                | PTGS2   |
| RELA   | transcription                | RELA    |
| RELA   | transcription                | RELB    |
| RELA   | transcription                | SAA2    |
| RELA   | transcription                | SDC4    |
| RELA   | transcription                | SOX9    |
| RELA   | transcription                | TLR2    |
| RELA   | transcription                | TNF     |
| RELA   | transcription                | TNFAIP3 |
| RELA   | translocation                | RELA    |
| RELA   | ubiquitination               | RELA    |
| RPL7   | protein-protein interactions | RELA    |
| RSF1   | protein-protein interactions | RELA    |
| RUNX1  | translocation                | RELA    |
| RUVBL1 | protein-protein interactions | RELA    |
| SMAD3  | protein-protein interactions | RELA    |
| SQSTM1 | expression                   | RELA    |
| SQSTM1 | translocation                | RELA    |
| STAT1  | protein-protein interactions | RELA    |
| STAT2  | translocation                | RELA    |
| STAT3  | localization                 | RELA    |
| STAT3  | protein-protein interactions | RELA    |
| STAT3  | translocation                | RELA    |
| TAF4B  | protein-protein interactions | RELA    |
| TAF9   | protein-protein interactions | RELA    |
| TFAP2A | protein-protein interactions | RELA    |

|         |                              |      |
|---------|------------------------------|------|
| TFCP2   | protein-protein interactions | RELA |
| TLE1    | protein-protein interactions | RELA |
| TSC22D3 | activation                   | RELA |
| TSC22D3 | protein-protein interactions | RELA |
| TSC22D3 | regulation of binding        | RELA |
| TSC22D3 | translocation                | RELA |
| VDR     | protein-protein interactions | RELA |
| YAP1    | protein-protein interactions | RELA |
| YBX1    | protein-protein interactions | RELA |
| ZFP36   | activation                   | RELA |
| ZFP36   | modification                 | RELA |
| ZFP36   | protein-protein interactions | RELA |
| ZFP36   | translocation                | RELA |
